# Supplementary material
Source: Springer Nature journal article supplement (https://www.springermedizin.de/resource/supplementary/12905_2011_270_MOESM1_ESM.pdf/9518326)

| History                                                                                                                                                                                                                                                                                                                                            |                                                                                                                    | Ambient of Society                                                                                                      |                                                                                                | Contingency                                                                                                  |                                                                                                                                                                               |
|----------------------------------------------------------------------------------------------------------------------------------------------------------------------------------------------------------------------------------------------------------------------------------------------------------------------------------------------------|--------------------------------------------------------------------------------------------------------------------|-------------------------------------------------------------------------------------------------------------------------|------------------------------------------------------------------------------------------------|--------------------------------------------------------------------------------------------------------------|-------------------------------------------------------------------------------------------------------------------------------------------------------------------------------|
| <b>Facilitators</b><br><i>Foundation of a children's hospital based on humanistic aim</i><br><br><i>Progress towards the humanization</i><br>» Rooming in system<br>» LDR Room<br>» Accepting companion<br>» Family- centered approach<br>» Mother-child reference center<br>» Open door to normal pregnancies<br>» Integrating midwives in future | <b>Barriers</b><br><i>A referral center with leadership role</i><br>» Development of technology and specialization | <b>Facilitators</b><br><i>The humanized birth movement in society</i><br>» The 'La Leche' Group<br>» Feminist movements | <b>Barriers</b><br>Advancing the level of specialty and technology rather humanization of care | <b>Facilitators</b><br><i>Multi-institutional collaboration</i><br>» University Network Integrated to Health | <b>Barriers</b><br><i>Economic influence on:</i><br>» Lack of human and physical resources<br><br><i>Shortage of professionals</i><br>» Shortage of health care professionals |

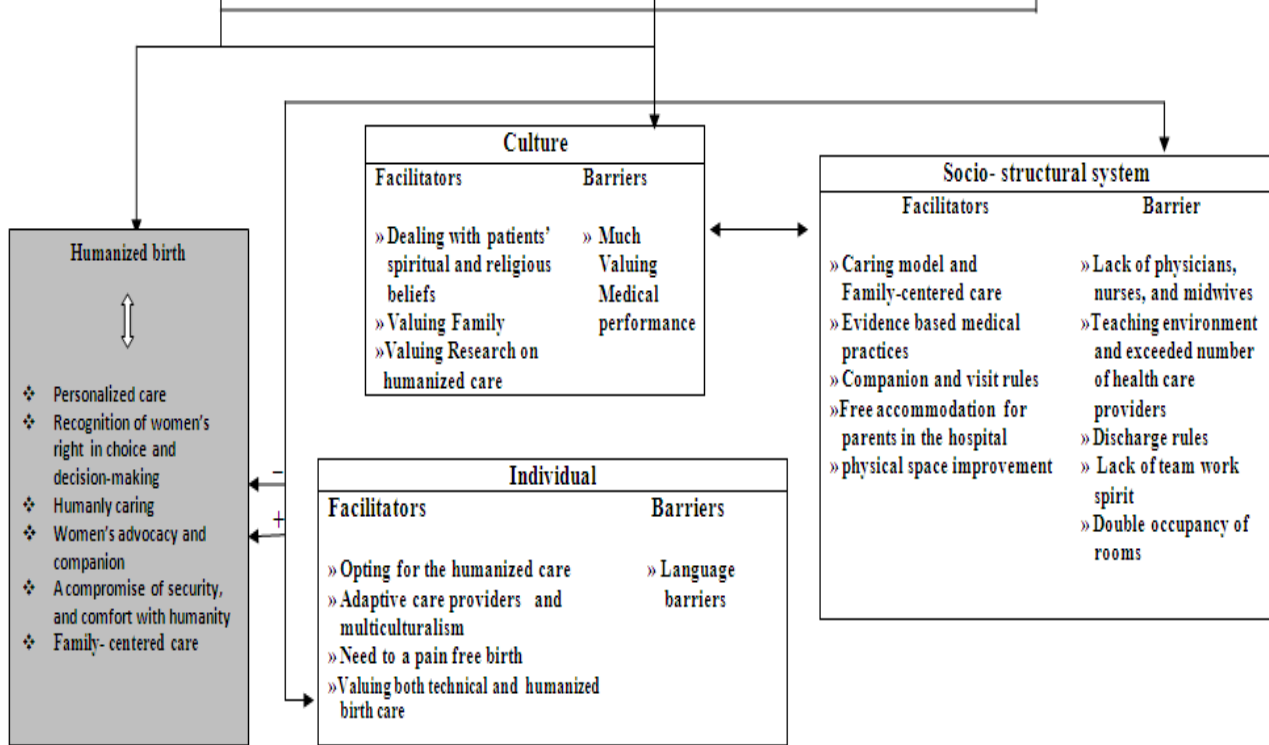

Supplement: MOESM1 [file 9518326]
